# Supplementary material
Source: PubMed Central journal article supplement (PMC7939118)
Supplement: NIHMS1671914-supplement-1.pdf [file NIHMS1671914-supplement-1.pdf]

**Supplementary Table 1: Induction regimens received upon diagnosis of pPCL**

| <b>INDUCTION REGIMENS</b>                       | <b>N (%)</b> |
|-------------------------------------------------|--------------|
| <b>PI alone</b>                                 | 24 (35%)     |
| • CyBord                                        | 16           |
| • CyKd                                          | 1            |
| • VMP                                           | 1            |
| • PAD                                           | 1            |
| • VDoxD                                         | 1            |
| • Vd                                            | 3            |
| • VD-PACE                                       | 1            |
| <b>IMiD alone</b>                               | 4 (6%)       |
| • CyRd                                          | 1            |
| • Rd                                            | 1            |
| • Td                                            | 2            |
| <b>PI and IMiD combination</b>                  | 38 (56%)     |
| • VRd                                           | 21           |
| • VTd                                           | 3            |
| • KRd                                           | 3            |
| • VDT-PACE or VDR-PACE                          | 11           |
| <b>Monoclonal antibody/ PI/IMiD combination</b> | 2 (3%)       |
| • Dara-IRd                                      | 1            |
| • Elo-VRd                                       | 1            |

**Supplementary Table 2: IMWG-based best hematological responses observed during first line therapy**

| <b>Induction regimens (N)</b>   | <b>ORR %</b> | <b>≥VGPR%</b> | <b>CR%</b> | <b>VGPR %</b> | <b>PR%</b> | <b>SD%</b> | <b>PD%</b> |
|---------------------------------|--------------|---------------|------------|---------------|------------|------------|------------|
| <b>All regimens (57)</b>        | 51 (90%)     | 45 (79%)      | 27 (47%)   | 18 (32%)      | 6 (11%)    | 3 (5%)     | 3 (5%)     |
| • <b>PI or IMiD alone (12)</b>  | 10 (83%)     | 8 (67%)       | 2 (17%)    | 6 (50%)       | 2 (17%)    | –          | 2 (16%)    |
| • <b>PI or IMiD + ASCT (12)</b> | 11 (92%)     | 11 (92%)      | 7 (58%)    | 4 (34%)       | –          | 1 (8%)     | –          |
| • <b>PI-IMiD alone (10)</b>     | 8 (80%)      | 5 (50%)       | 4 (40%)    | 1 (10%)       | 3 (30%)    | 1 (10%)    | 1 (10%)    |
| • <b>PI-IMiD + ASCT (20)</b>    | 19 (95%)     | 18 (90%)      | 12 (60%)   | 6 (30%)       | 1 (5%)     | 1 (5%)     | –          |
| • <b>PI-IMiD + Allo-SCT (3)</b> | 3 (100%)     | 3 (100%)      | 2 (67%)    | 1 (33%)       | –          | –          | –          |

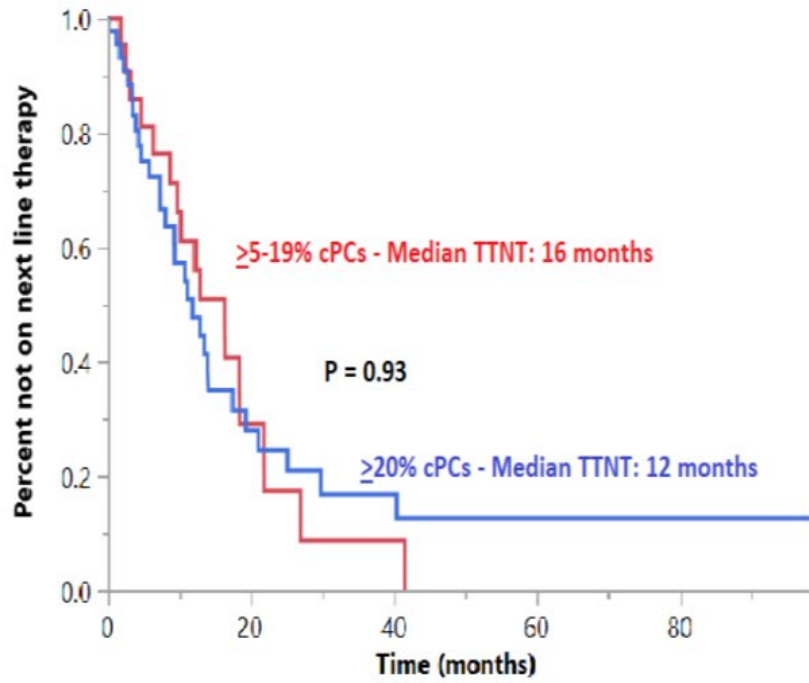

Supplementary Figure 1A

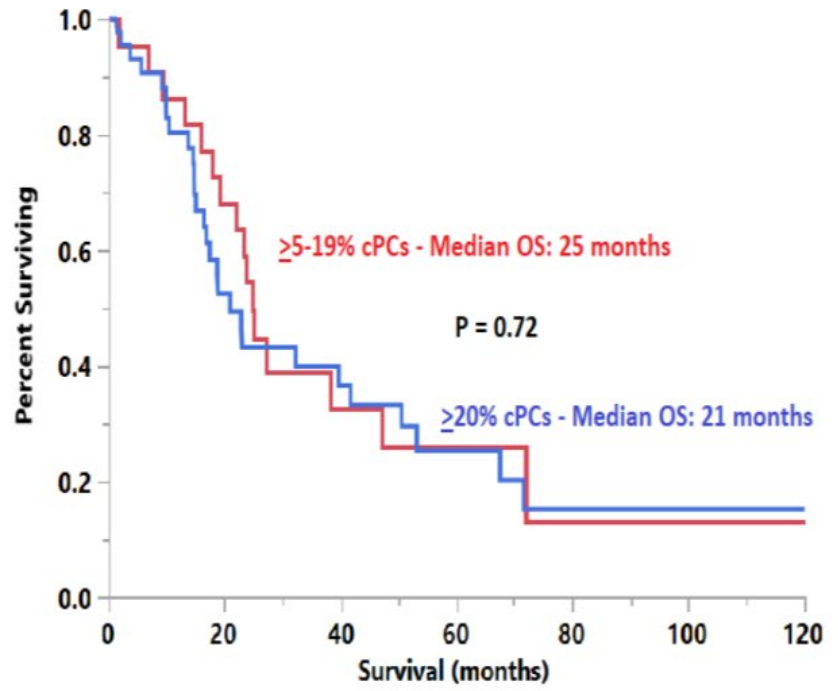

Supplementary Figure 1B
